# Supplementary material for: Multicentric analytical comparability study of programmed death-ligand 1 expression on tumor-infiltrating immune cells and tumor cells in urothelial bladder cancer using four clinically developed immunohistochemistry assays
Source: Springer Nature journal article supplement (doi:10.1007/s00428-019-02610-z), 2019-07-02
Supplement: MOESM1 [file 16875220]

# Multicentric analytical comparability study of programmed death-ligand 1 expression on tumor-infiltrating immune cells and tumor cells in urothelial bladder cancer using four clinically developed immunohistochemistry assays

K Schwamborn *et al.*

## Electronic supplementary material

**Fig. S1.** Example staining for (a) PD-L1-stained IC (5%) and (b) PD-L1-negative IC, with each assay. H&E = hematoxylin and eosin; IC = tumor-infiltrating immune cells; PD-L1 = programmed death-ligand 1

*For readers of this publication, digital images of all cases stained with H&E, pan-cytokeratin or either of the four PD-L1 assays are available online at <http://www.roche.de/pdl1testing>*

**a**

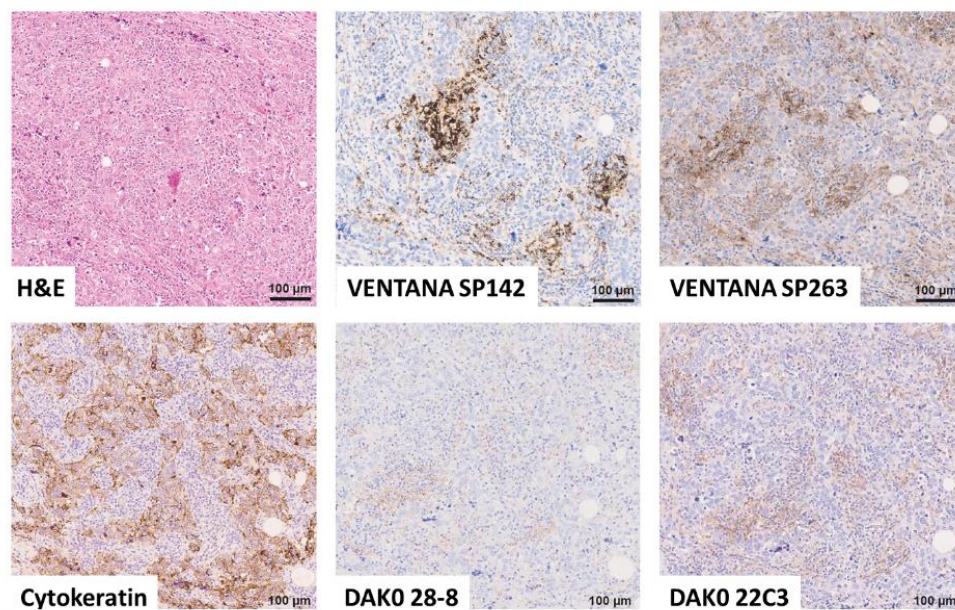

**b**

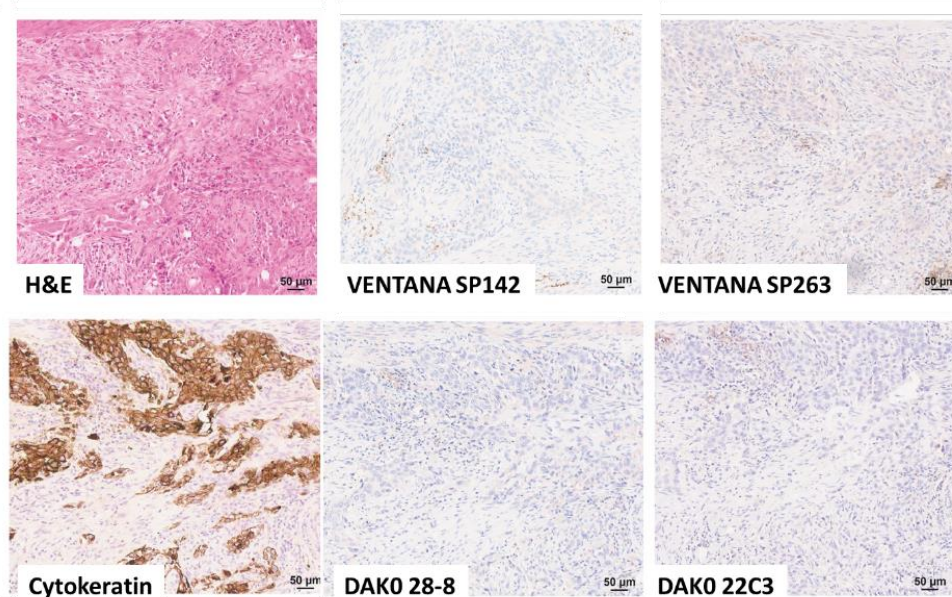

**Fig. S2.** Percentage of PD-L1-stained IC for each assay and each reader. IC = tumor-infiltrating immune cells; PD-L1 = programmed death-ligand 1; R = reader

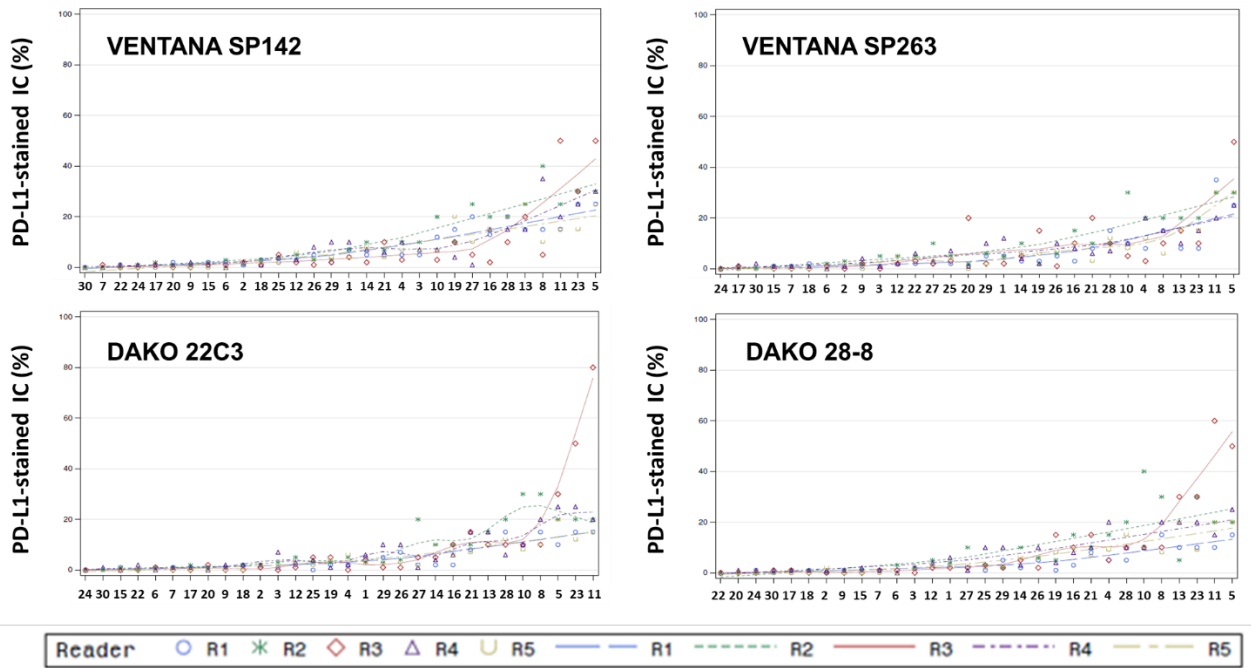

**Fig. S3.** Percentage of PD-L1-stained TC for each assay and each reader. PD-L1 = programmed death-ligand 1; TC = tumor cells

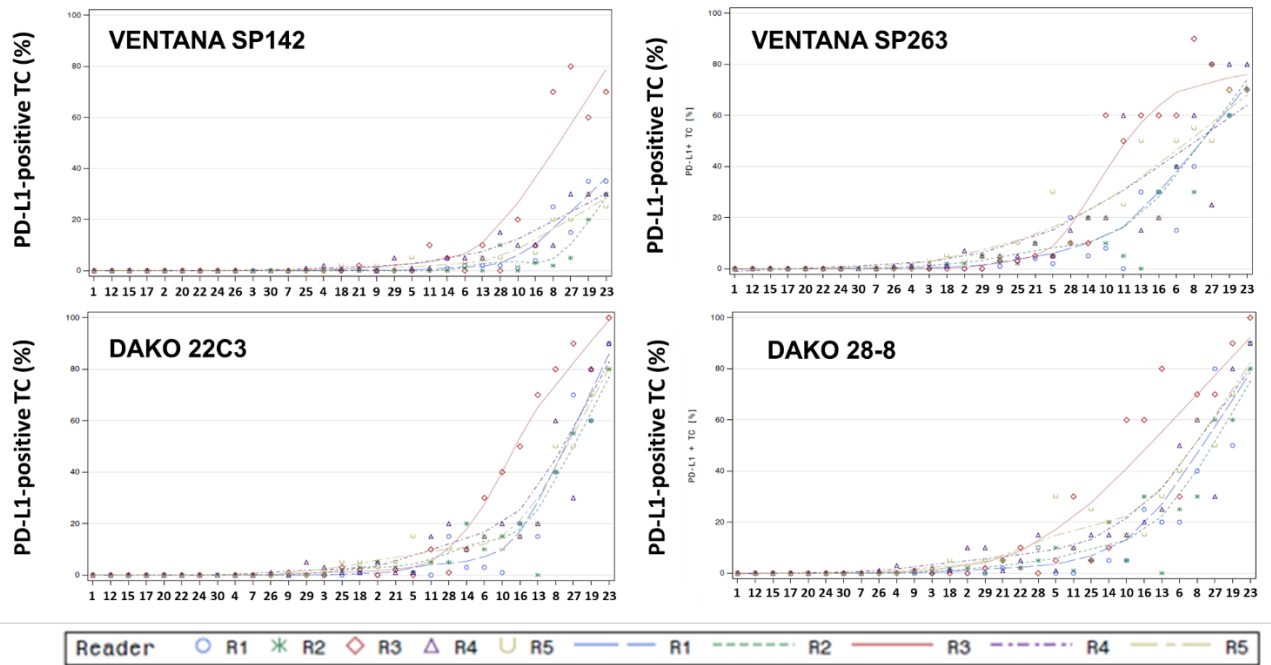

**Table S1.** Characteristics and clinical features of cases

| <b>Patients, <i>n</i> (%)</b> | <b>&lt;1%<br/><i>n</i> = 10</b> | <b>1–5%<br/><i>n</i> = 10</b> | <b>&gt;5%<br/><i>n</i> = 10</b> | <b>All<br/><i>N</i> = 30</b> |
|-------------------------------|---------------------------------|-------------------------------|---------------------------------|------------------------------|
| <b>Biopsy type</b>            |                                 |                               |                                 |                              |
| Cystectomy                    | 8 (80)                          | 7 (70)                        | 7 (7)                           | 22 (73)                      |
| Transurethral resection       | 2 (20)                          | 3 (30)                        | 3 (30)                          | 8 (27)                       |
| <b>TNM classification</b>     |                                 |                               |                                 |                              |
| pT2                           | 3 (30)                          | 4 (40)                        | 3 (30)                          | 10 (33)                      |
| pT3+                          | 7 (70)                          | 6 (60)                        | 7 (70)                          | 20 (67)                      |
| <b>BCG pre-treatment</b>      |                                 |                               |                                 |                              |
| Yes                           | 1 (10)                          | 1 (10)                        | 0 (0)                           | 2 (7)                        |
| No                            | 9 (90)                          | 8 (80)                        | 4 (40)                          | 21 (70)                      |
| Information missing           | 0 (0)                           | 1 (10)                        | 6 (60)                          | 7 (23)                       |

TNM = tumour, node, and metastasis; BCG = Bacillus Calmette–Guérin

**Table S2.** Differences in adjusted means between assays for PD-L1-stained IC and TC

| PD-L1-positive IC             |                                       |                |
|-------------------------------|---------------------------------------|----------------|
| Assay pair                    | Difference in adjusted means (95% CI) | <i>P</i> value |
| VENTANA SP142 – VENTANA SP263 | 1.1 (–0.6 to 2.8)                     | 0.3500         |
| VENTANA SP142 – DAKO 22C3     | 1.6 (–0.1 to 3.3)                     | 0.0646         |
| VENTANA SP142 – DAKO 28-8     | 1.3 (–0.4 to 3.0)                     | 0.2029         |
| VENTANA SP263 – DAKO 22C3     | 0.5 (–1.2 to 2.2)                     | 0.8442         |
| VENTANA SP263 – DAKO 28-8     | 0.2 (–1.5 to 1.9)                     | 0.9900         |
| DAKO 22C3 – DAKO 28-8         | –0.3 (–2.0 to 1.4)                    | 0.9548         |
| PD-L1-positive TC             |                                       |                |
| Assay pair                    | Difference in adjusted means (95% CI) | <i>P</i> value |
| VENTANA SP142 – VENTANA SP263 | –10.5 (–13.7 to –7.3)                 | <0.0001        |
| VENTANA SP142 – DAKO 22C3     | –7.8 (–11.0 to –4.6)                  | <0.0001        |
| VENTANA SP142 – DAKO 28-8     | –9.7 (–12.9 to –6.5)                  | <0.0001        |
| VENTANA SP263 – DAKO 22C3     | 2.7 (–0.5 to 5.9)                     | 0.1325         |
| VENTANA SP263 – DAKO 28-8     | 0.8 (–2.4 to 3.9)                     | 0.9251         |
| DAKO 22C3 – DAKO 28-8         | –1.9 (–5.1 to 1.3)                    | 0.4065         |

CI = confidence interval; IC = tumor-infiltrating immune cells; PD-L1 = programmed death-ligand 1; TC = tumor cells.

**Table S3.** Inter-assay agreement Kappa values for each reader at different cutoffs for IC

| PD-L1-positive IC |                   |          |                     |
|-------------------|-------------------|----------|---------------------|
| Reader            | Cutoff points (%) | <i>n</i> | Kappa (95% CI)      |
| R1                | >1                | 30       | 0.642 (0.496–0.788) |
|                   | >5                | 30       | 0.683 (0.536–0.829) |
|                   | >10               | 30       | 0.440 (0.294–0.586) |
| R2                | >1                | 30       | 0.609 (0.462–0.755) |
|                   | >5                | 30       | 0.751 (0.605–0.897) |
|                   | >10               | 30       | 0.763 (0.617–0.909) |
| R3                | >1                | 27       | 0.672 (0.518–0.826) |
|                   | >5                | 27       | 0.763 (0.609–0.917) |
|                   | >10               | 27       | 0.609 (0.455–0.763) |
| R4                | >1                | 30       | 0.633 (0.487–0.779) |
|                   | >5                | 30       | 0.811 (0.665–0.957) |
|                   | >10               | 30       | 0.680 (0.534–0.826) |
| R5                | >1                | 30       | 0.923 (0.333–1.000) |
|                   | >5                | 30       | 0.771 (0.625–0.918) |
|                   | >10               | 30       | 0.711 (0.565–0.857) |

CI = confidence interval; IC = tumor-infiltrating immune cells; PD-L1 = programmed death-ligand 1; R = reader

**Table S4.** Inter-reader agreement Kappa values for each assay at different cutoffs for IC

| PD-L1-positive IC |                   |          |                     |
|-------------------|-------------------|----------|---------------------|
| Assay             | Cutoff points (%) | <i>n</i> | Kappa (95% CI)      |
| VENTANA SP142     | >1                | 28       | 0.609 (0.492–0.726) |
|                   | >5                | 28       | 0.575 (0.458–0.692) |
|                   | >10               | 28       | 0.706 (0.589–0.823) |
| VENTANA SP263     | >1                | 28       | 0.685 (0.568–0.802) |
|                   | >5                | 28       | 0.551 (0.434–0.668) |
|                   | >10               | 28       | 0.343 (0.225–0.460) |
| DAKO 22C3         | >1                | 29       | 0.533 (0.418–0.648) |
|                   | >5                | 29       | 0.732 (0.617–0.847) |
|                   | >10               | 29       | 0.578 (0.463–0.693) |
| DAKO 28-8         | >1                | 30       | 0.801 (0.687–0.914) |
|                   | >5                | 30       | 0.630 (0.516–0.743) |
|                   | >10               | 30       | 0.418 (0.305–0.532) |

CI = confidence interval; IC = tumor-infiltrating immune cells; PD-L1 = programmed death-ligand 1

**Table S5.** Inter-assay agreement Kappa values for each reader at different cutoffs for TC

| PD-L1-positive TC |                   |          |                     |
|-------------------|-------------------|----------|---------------------|
| Reader            | Cutoff points (%) | <i>n</i> | Kappa (95% CI)      |
| R1                | >1                | 30       | 0.761 (0.615–0.907) |
|                   | >5                | 30       | 0.752 (0.605–0.898) |
|                   | >10               | 30       | 0.771 (0.625–0.917) |
| R2                | >1                | 30       | 0.570 (0.424–0.716) |
|                   | >5                | 30       | 0.560 (0.414–0.707) |
|                   | >10               | 30       | 0.659 (0.513–0.805) |
| R3                | >1                | 28       | 0.702 (0.550–0.853) |
|                   | >5                | 28       | 0.844 (0.693–0.996) |
|                   | >10               | 28       | 0.807 (0.656–0.958) |
| R4                | >1                | 30       | 0.678 (0.532–0.824) |
|                   | >5                | 30       | 0.704 (0.558–0.850) |
|                   | >10               | 30       | 0.656 (0.510–0.802) |
| R5                | >1                | 30       | 0.673 (0.527–0.819) |
|                   | >5                | 30       | 0.650 (0.504–0.796) |
|                   | >10               | 30       | 0.644 (0.498–0.790) |

CI = confidence interval; PD-L1 = programmed death-ligand 1; R = reader; TC = tumor cells



**Table S6.** Inter-reader agreement Kappa values for each assay at different cutoffs for TC

| <b>PD-L1-positive TC</b> |                          |                 |                       |
|--------------------------|--------------------------|-----------------|-----------------------|
| <b>Assay</b>             | <b>Cutoff points (%)</b> | <b><i>n</i></b> | <b>Kappa (95% CI)</b> |
| VENTANA SP142            | >1                       | 28              | 0.572 (0.455–0.689)   |
|                          | >5                       | 28              | 0.610 (0.493–0.727)   |
|                          | >10                      | 28              | 0.726 (0.609–0.843)   |
| VENTANA SP263            | >1                       | 29              | 0.747 (0.632–0.862)   |
|                          | >5                       | 29              | 0.769 (0.654–0.884)   |
|                          | >10                      | 29              | 0.745 (0.630–0.860)   |
| DAKO 22C3                | >1                       | 29              | 0.640 (0.525–0.755)   |
|                          | >5                       | 29              | 0.748 (0.633–0.863)   |
|                          | >10                      | 29              | 0.707 (0.591–0.822)   |
| DAKO 28-8                | >1                       | 30              | 0.652 (0.539–0.766)   |
|                          | >5                       | 30              | 0.638 (0.525–0.751)   |
|                          | >10                      | 30              | 0.730 (0.617–0.843)   |

CI = confidence interval; PD-L1 = programmed death-ligand 1; TC = tumor cells
